# Supplementary material
Source: Royal Society of Chemistry journal article supplement (doi:10.1039/d6ea00015k)
Supplement: d6ea00015k1.pdf [file d6ea00015k1.pdf]

**Trace elements in *Sphagnum* moss waters as indicators of the chemical reactivity of contemporary atmospheric dusts: comparison with peat bog porewaters**

Sundas Arooj Butt, Fiorella Barraza, Na Chen, and William Shotyk\*

Department of Renewable Resources, University of Alberta. Edmonton, AB, Canada.

\*Corresponding author: [shotyk@ualberta.ca](mailto:shotyk@ualberta.ca)

[sundas@ualberta.ca](mailto:sundas@ualberta.ca), [barrazac@ualberta.ca](mailto:barrazac@ualberta.ca), [na3@ualberta.ca](mailto:na3@ualberta.ca)

Number of pages: 18

Number of Figures: 6

Number of Tables: 8

**Section 1. Potential impact of pressure changes during squeezing on TE concentrations**

Approximately 5 g of the living *Sphagnum* moss layers were centrifuged for 10 minutes at 2000 (689 x g), 6000 (6198 x g) and 10,000 (17217 x g) RPM (RCF), using centrifuge tubes with built-in 0.45 µm filter membranes. Although the volume of extracted water increased with increasing centrifuge speed (0.5 mL at 2000 to ~ 4 mL at 10,000 RPM), negligible variations were observed in the concentrations of most TEs across different centrifugation speeds (Fig. S12). These findings suggest that minor changes in pressure during squeezing are unlikely to significantly affect TE concentrations.

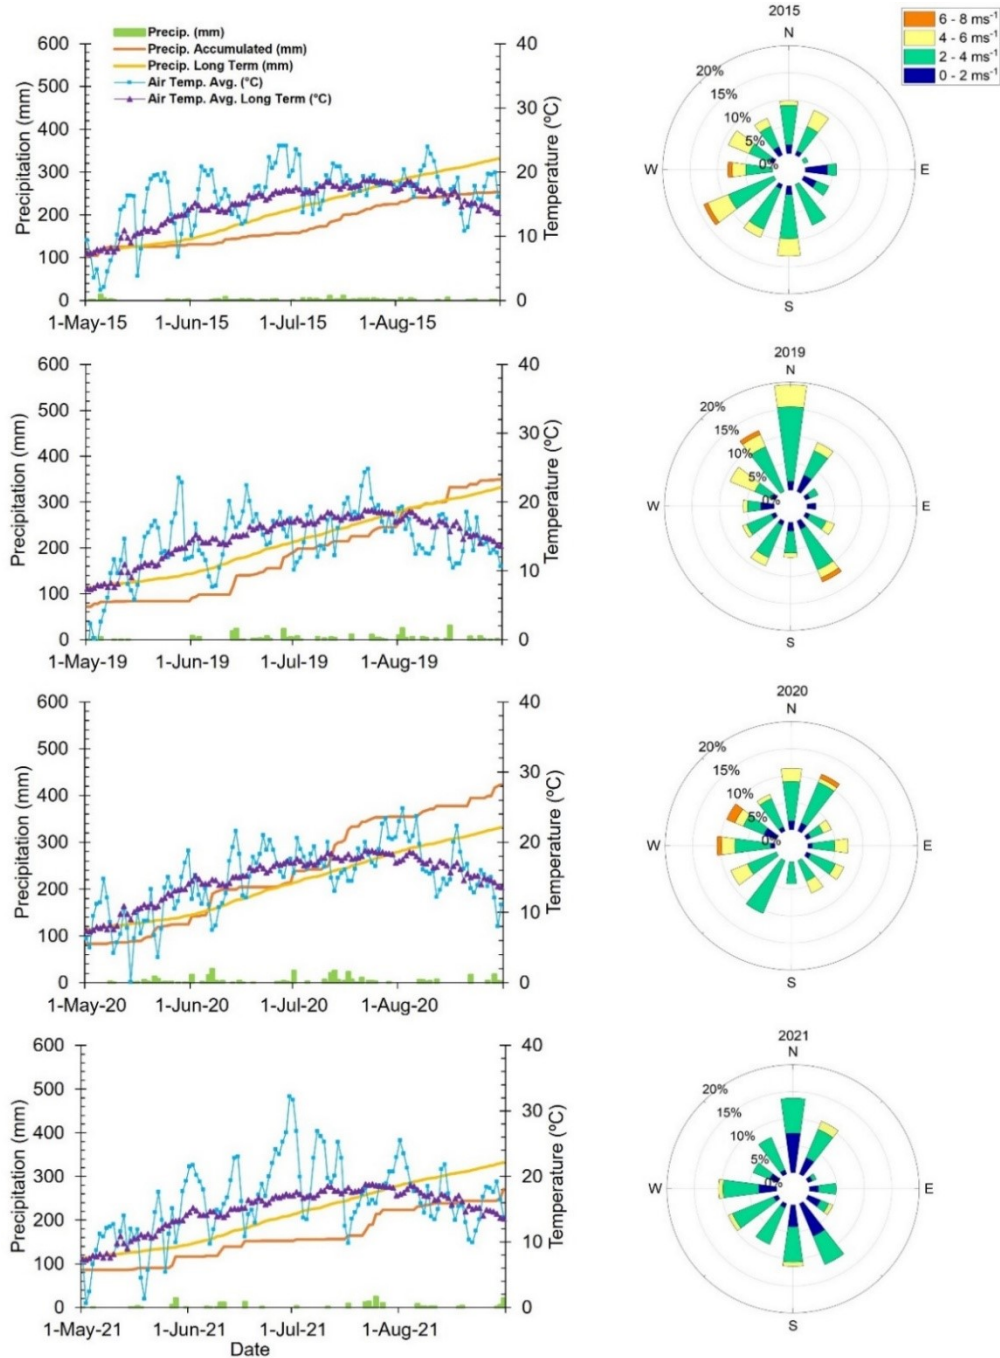

**Figure S11.** Daily precipitation, temperature, and wind speed and direction in the Athabasca Bituminous Sands region (ABS) in 2015, 2019-2021.

Note: Historic daily weather data from 1 May to 31<sup>st</sup> August of the respective years was downloaded from the Government of Canada from the Mildred Lake station (Latitude: 57°02'28.000" N, Longitude: 111°33'32.000" W, Elevation: 310.00 m, Climate Identifier (ID): 3064528, World Meteorological Organization (WMO) ID: 71255, Transport Canada (TC) ID: WMX)

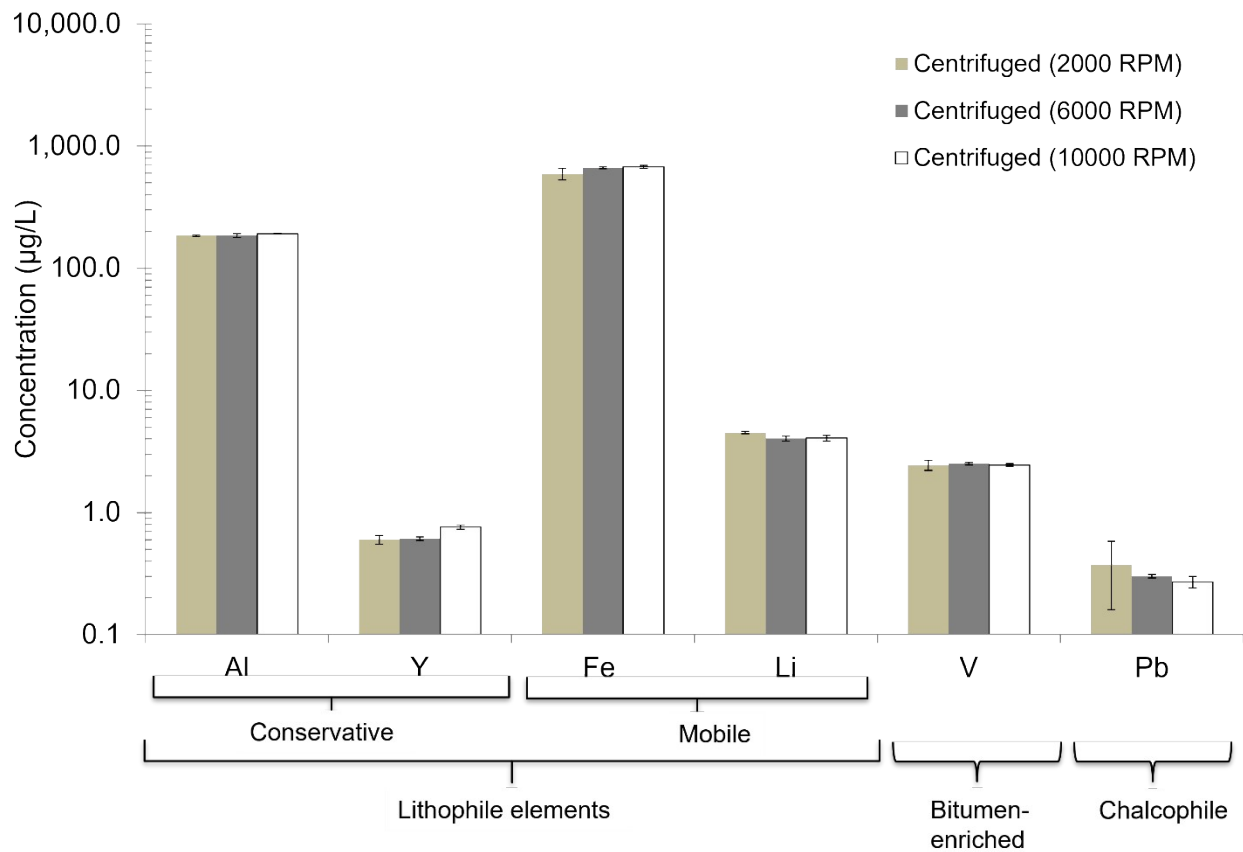

**Figure S12.** Average concentrations of selected trace elements in moss waters extracted through centrifugation at different speeds (2000 (689 x g), 6000 (6198 x g) and 10,000 (17217 x g) RPM (RCF)).

Note: Error bars represent the standard deviation. All elements within these groups show similar trends; therefore, only selected elements are presented.

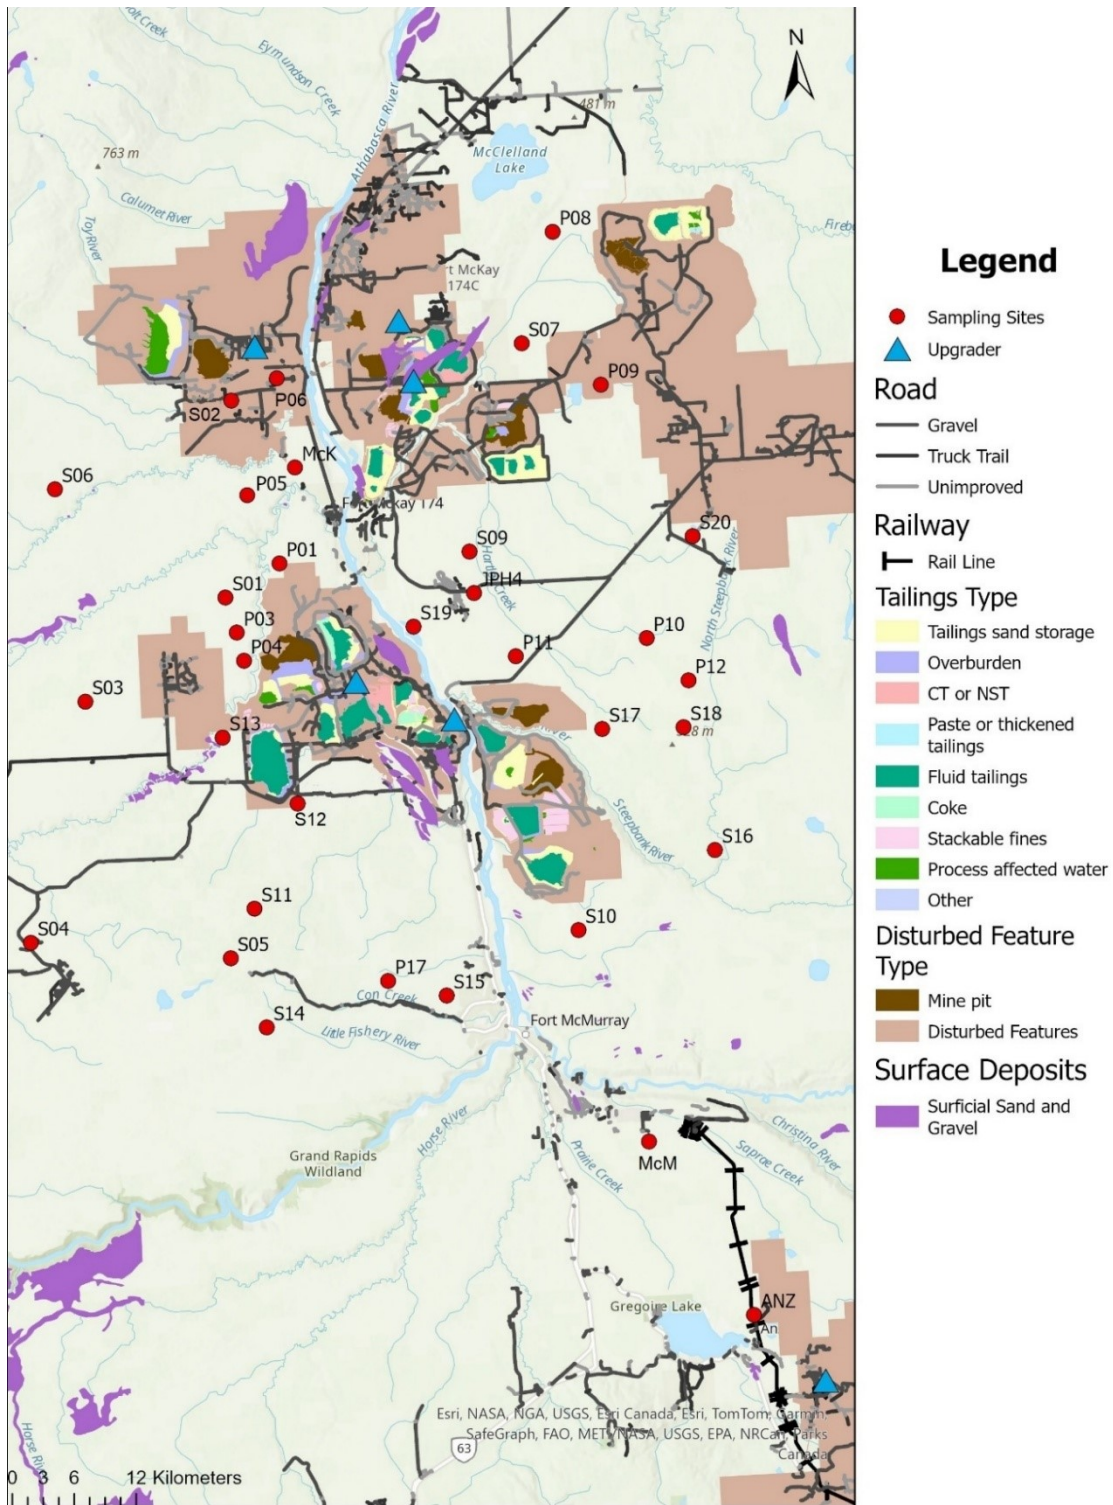

**Figure S13.** Map showing the potential sources of dust emissions in the ABS region,<sup>44</sup> highlighted by different colours, with moss sampling sites indicated by red bullets.

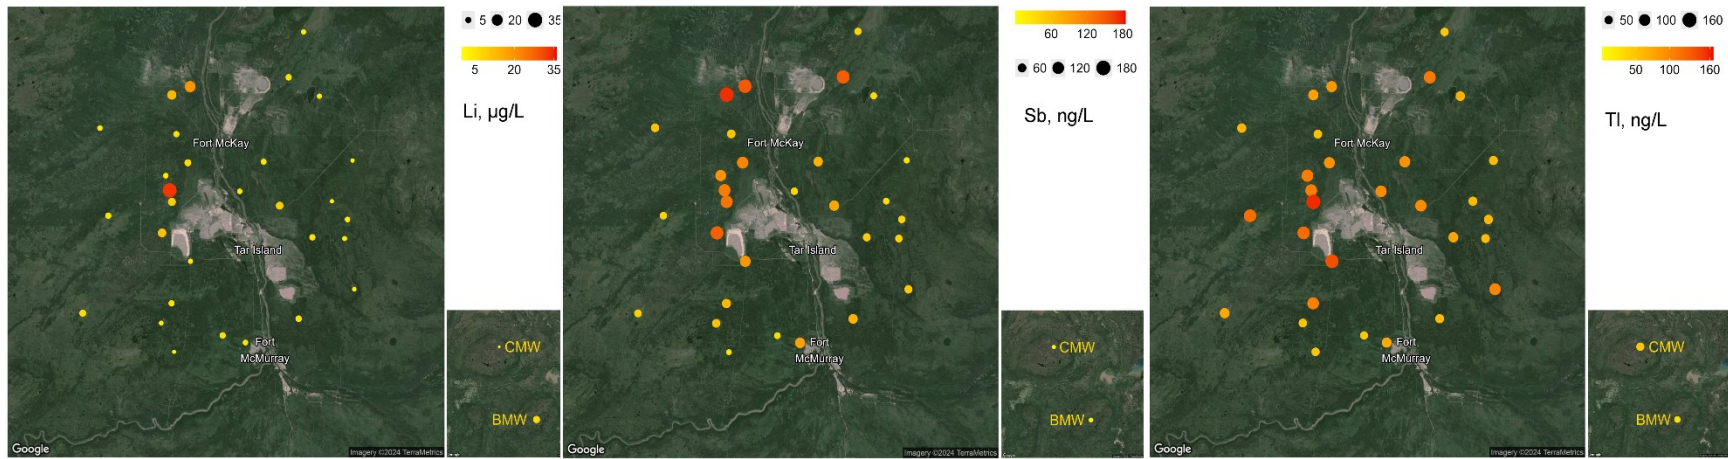

**Figure SI4.** Spatial variation in the concentrations of Li, Sb and Tl in moss waters, in autumn 2015.

Notes: CMW = Caribou Mountains Wildland and BMW = Birch Mountains Wildland. Both CMW and BMW were used as reference sites.

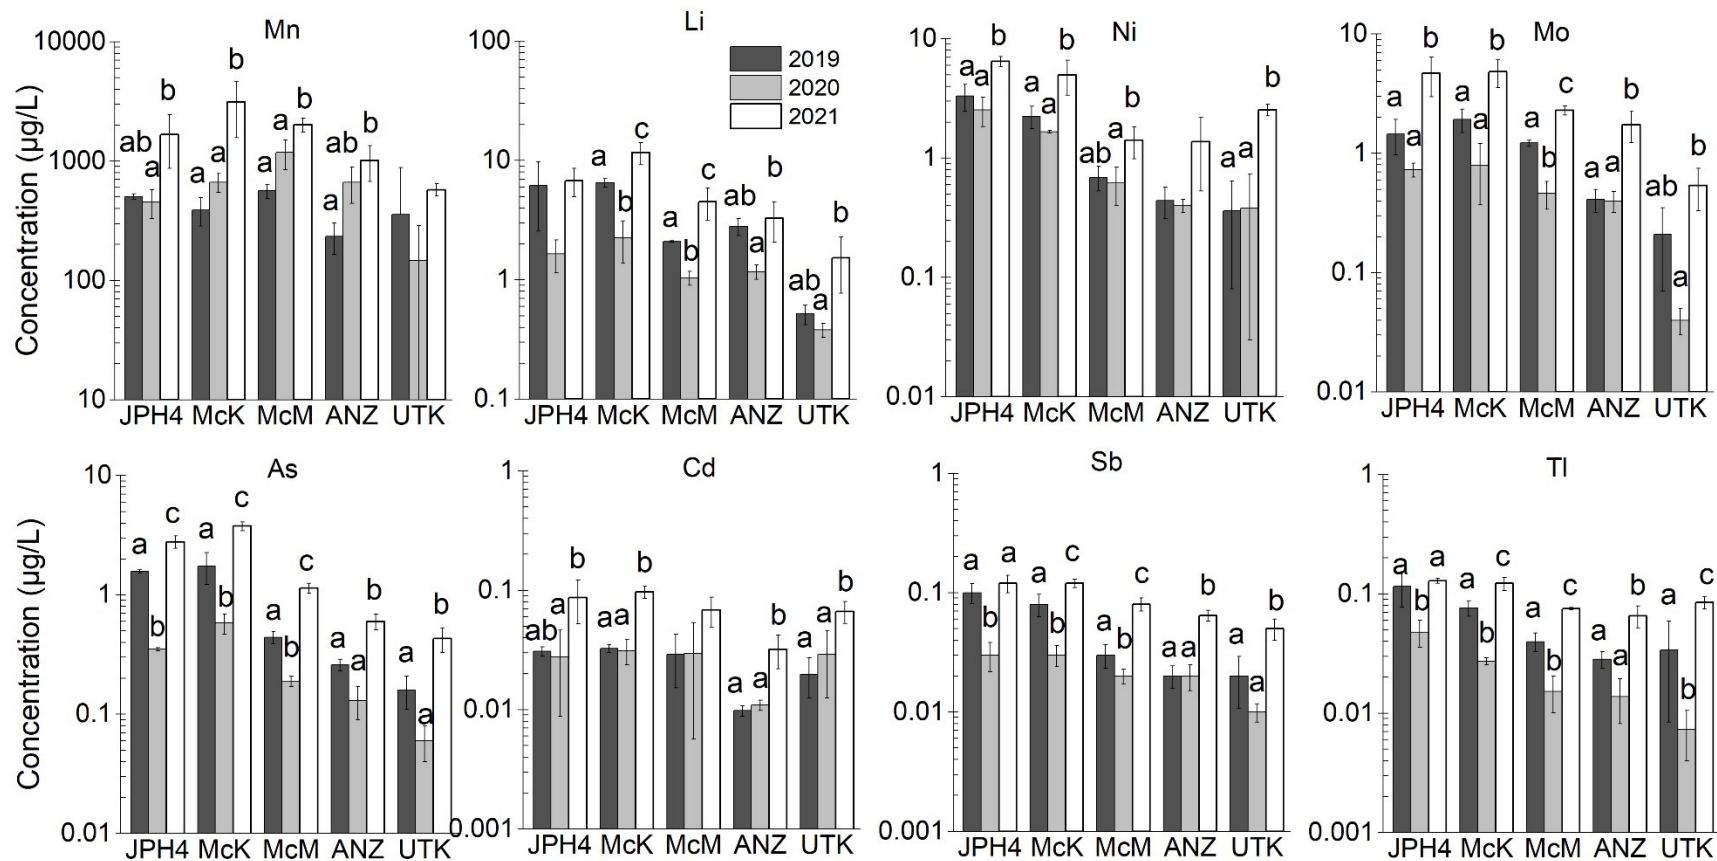

**Figure S15.** Interannual variation in the dissolved concentrations of selected TEs in moss waters.

Notes: Error bars represent the standard deviation. Sites are ordered from right to left based on their proximity to the mining area. Bars having different letters indicate significant interannual variations in concentration at that site, while those sharing the same letter or no letters indicate insignificant differences.

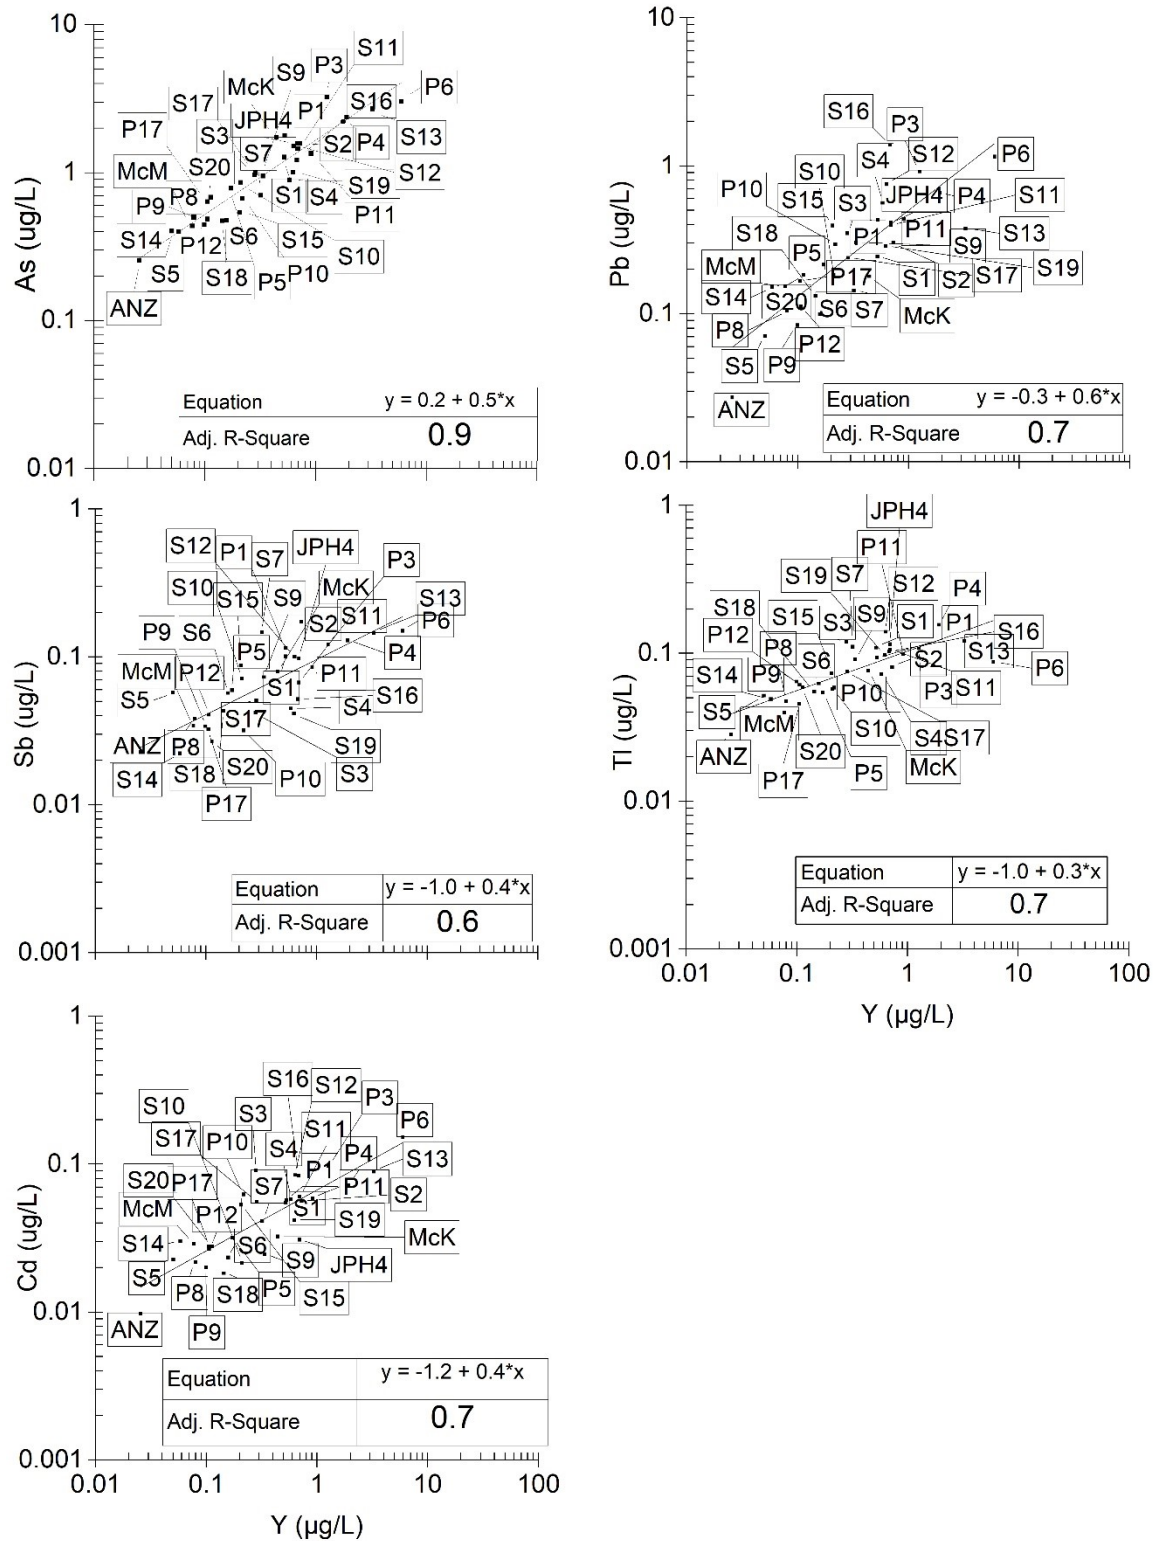

**Figure SI6.** Correlation between chalcophile elements (As, Pb, Sb, Tl, and Cd) and Y in moss waters collected from bog sites in the Athabasca Bituminous Sands region.

**Table SI1.** ICP-MS limit of detection (LOD), limit of quantification (LOQ), method detection limit (MDL) and water standard reference materials (SRMs) recoveries for autumn 2015 samples.

|    |      |      |      | NIST 1640a - Elements in Natural Surface Water |                              |          | SPS-SW2 - Elements in Surface Water |                              |          |
|----|------|------|------|------------------------------------------------|------------------------------|----------|-------------------------------------|------------------------------|----------|
|    | LOD  | LOQ  | MDL  | Certified Value                                | Measured Value (Mean, n = 4) | Recovery | Certified Value                     | Measured Value (Mean, n = 5) | Recovery |
|    | ng/L | ng/L | ng/L | µg/L                                           | µg/L                         | %        | µg/L                                | µg/L                         | %        |
| Al | 12   | 125  | 325  | 53                                             | 55                           | 104      | 250                                 | 257                          | 103      |
| As | 1.0  | 7.3  | <LOQ | 8.1                                            | 8.2                          | 101      | 50                                  | 52                           | 104      |
| Cd | 0.1  | 0.5  | <LOQ | 4.0                                            | 4.0                          | 100      | 2.5                                 | 2.6                          | 104      |
| Fe | 29   | 135  | 176  | 36.8                                           | 39.9                         | 108      | 100                                 | 105                          | 105      |
| Li | 0.7  | 18   | <LOD | 0.4                                            | 0.3                          | 83       |                                     |                              |          |
| Mn | 0.9  | 5.1  | 344  | 40.4                                           | 40.9                         | 101      | 50                                  | 51                           | 103      |
| Mo | 0.5  | 2.0  | 2.9  | 45.6                                           | 45.4                         | 100      | 50                                  | 49.7                         | 99       |
| Ni | 0.8  | 21   | <LOD | 25.3                                           | 25.2                         | 100      | 50                                  | 50                           | 100      |
| Pb | 0.1  | 0.4  | 1.4  | 12.1                                           | 12.2                         | 101      | 25                                  | 25                           | 100      |
| Sb | 0.5  | 2.2  | <LOD | 5.1                                            | 5.3                          | 104      |                                     |                              |          |
| Sr | 0.5  | 3.7  | 18   | 126                                            | 130                          | 103      | 250                                 | 261                          | 104      |
| Th | 0.0  | 0.4  | 0.5  |                                                |                              |          | 2.5                                 | 2.2                          | 90       |
| Tl | 0.1  | 0.7  | <LOD | 1.6                                            | 1.6                          | 99       | 2.5                                 | 2.5                          | 99       |
| V  | 0.4  | 2.0  | <LOD | 15.1                                           | 15.1                         | 100      | 50                                  | 50                           | 100      |
| Y  | 0.1  | 0.5  | 0.6  |                                                |                              |          | 2.5                                 | 2.6                          | 103      |

LOD =  $(3 \times \text{SD Blank Intensity}) \times \text{Std conc.} / \text{Std Intensity} - \text{Blank Intensity}$ , LOQ =  $(\text{Blank Intensity} + 10 \times \text{SD Blank Intensity}) \times \text{Std conc.} / \text{Std Intensity} - \text{Blank Intensity}$ , MDL =  $\bar{x} + 3 \times \text{SD}$  (where  $\bar{x}$  = average concentration in method blanks, and SD = standard deviation in method blanks value)

**Table SI2.** ICP-MS limit of detection (LOD), limit of quantification (LOQ), method detection limit (MDL) and water standard reference materials (SRMs) recoveries for autumn 2019 and 2020 samples.

|    | NIST 1640a - Elements in Natural Surface Water |      |      |                 |                              |          | SPS-SW2 - Elements in Surface Water |                              |          |
|----|------------------------------------------------|------|------|-----------------|------------------------------|----------|-------------------------------------|------------------------------|----------|
|    | LOD                                            | LOQ  | MDL  | Certified Value | Measured Value (Mean, n = 5) | Recovery | Certified Value                     | Measured Value (Mean, n = 5) | Recovery |
|    | ng/L                                           | ng/L | ng/L | µg/L            | µg/L                         | %        | µg/L                                | µg/L                         | %        |
| As | 3.9                                            | 17.7 | <LOD | 8.1             | 8.1                          | 100      | 50                                  | 52                           | 104      |
| Cd | 0.1                                            | 0.2  | <LOQ | 4.0             | 3.9                          | 97       | 2.5                                 | 2.5                          | 102      |
| Fe | 7.5                                            | 50.1 | <LOQ | 36.8            | 33.6                         | 91       | 100                                 | 93                           | 93       |
| Li | 0.1                                            | 1.1  | <LOQ | 0.4             | 0.4                          | 100      |                                     |                              |          |
| Mn | 0.9                                            | 5.3  | <LOQ | 40.4            | 32.5                         | 80       | 50                                  | 41                           | 82       |
| Mo | 0.4                                            | 1.6  | 1.7  | 45.6            | 40.1                         | 88       | 50                                  | 45                           | 90       |
| Ni | 0.6                                            | 8.7  | <LOD | 25.3            | 25.3                         | 100      | 50                                  | 51                           | 103      |
| Pb | 0.1                                            | 0.5  | 0.5  | 12.1            | 11.6                         | 96       | 25                                  | 24.5                         | 98       |
| Sb | 0.2                                            | 0.7  | 0.7  | 5.1             | 6.2                          | 120      |                                     |                              |          |
| Sr | 2.0                                            | 11.2 | 17.5 | 126             | 111                          | 88       | 250                                 | 226                          | 91       |
| Th | 0.0                                            | 0.2  | <LOD |                 |                              |          | 2.5                                 | 2.5                          | 98       |
| Tl | 0.0                                            | 0.1  | <LOQ | 1.6             | 1.5                          | 94       | 2.5                                 | 2.4                          | 97       |
| V  | 0.2                                            | 1.1  | <LOD | 15.1            | 14.6                         | 96       | 50                                  | 49                           | 98       |
| Y  | 0.0                                            | 0.1  | <LOQ |                 |                              |          | 2.5                                 | 2.6                          | 106      |

LOD =  $(3 \times \text{SD Blank Intensity}) \times \text{Std conc.} / \text{Std Intensity} - \text{Blank Intensity}$ , LOQ =  $(\text{Blank Intensity} + 10 \times \text{SD Blank Intensity}) \times \text{Std conc.} / \text{Std Intensity} - \text{Blank Intensity}$ , MDL =  $\bar{x} + 3 \times \text{SD}$  (where  $\bar{x}$  = average concentration in method blanks, and SD = standard deviation in method blanks value)

**Table SI3.** ICP-MS limit of detection (LOD), limit of quantification (LOQ), method detection limit (MDL) and water standard reference materials (SRM) recoveries for autumn 2021 samples.

|    |      |      |      | NIST 1643f - Elements in Fresh Water |                              |          | SPS-SW2 - Elements in Surface Water |                              |          |
|----|------|------|------|--------------------------------------|------------------------------|----------|-------------------------------------|------------------------------|----------|
|    | LOD  | LOQ  | MDL  | Certified Value                      | Measured Value (Mean, n = 6) | Recovery | Certified Value                     | Measured Value (Mean, n = 6) | Recovery |
|    | ng/L | ng/L | ng/L | µg/L                                 | µg/L                         | %        | µg/L                                | µg/L                         | %        |
| Al | 50   | 248  | 518  | 134                                  | 152                          | 114      | 250                                 | 287                          | 115      |
| As | 2.7  | 13   | <LOD | 57.4                                 | 60.6                         | 106      | 50                                  | 54                           | 107      |
| Cd | 0.1  | 0.3  | <LOQ | 5.9                                  | 6.2                          | 105      | 2.5                                 | 2.6                          | 105      |
| Fe | 26   | 150  | 543  | 93.4                                 | 98.4                         | 105      | 100                                 | 109                          | 109      |
| Li | 0.2  | 1.1  | <LOD | 16.6                                 | 17.0                         | 103      |                                     |                              |          |
| Mn | 0.7  | 4.8  | 15   | 37.1                                 | 37.7                         | 102      | 50                                  | 52                           | 104      |
| Mo | 0.5  | 3.2  | <LOQ | 115                                  | 109                          | 94       | 50                                  | 47                           | 94       |
| Ni | 2.0  | 14   | 23   | 59.8                                 | 59.2                         | 99       | 50                                  | 51                           | 103      |
| Pb | 0.1  | 0.4  | 1.5  | 18.5                                 | 19.4                         | 105      | 25                                  | 26                           | 104      |
| Sb | 0.2  | 0.9  | 5.4  | 55.5                                 | 56.3                         | 101      |                                     |                              |          |
| Sr | 0.6  | 2.1  | 20   | 314                                  | 307                          | 98       | 250                                 | 242                          | 97       |
| Th | 0.1  | 0.7  | <LOD |                                      |                              |          | 2.5                                 | 2.2                          | 86       |
| Tl | 0.0  | 0.2  | 3.9  | 6.9                                  | 7.2                          | 104      | 2.5                                 | 2.6                          | 105      |
| V  | 0.6  | 3.3  | <LOD | 36.1                                 | 37.1                         | 103      | 50                                  | 52                           | 103      |
| Y  | 0.1  | 0.3  | 2.4  |                                      |                              |          | 2.5                                 | 2.5                          | 99       |

LOD =  $(3 \times \text{SD Blank Intensity}) \times \text{Std conc.} / \text{Std Intensity} - \text{Blank Intensity}$ , LOQ =  $(\text{Blank Intensity} + 10 \times \text{SD Blank Intensity}) \times \text{Std conc.} / \text{Std Intensity} - \text{Blank Intensity}$ , MDL =  $\bar{x} + 3 \times \text{SD}$  (where  $\bar{x}$  = average concentration in method blanks, and SD = standard deviation in method blanks value)

**Table SI4.** Trace element concentrations in moss waters from peat bogs in the Athabasca Bituminous Sands (ABS) region and in remote areas (for reference). The ratios of MAX/MIN concentrations of TEs in the ABS region are also included.

| Industrial sites | Conservative |           |            | Mobile     |            |            |            | Bitumen-enriched |            |            | Chalcophile |            |            |            |            |
|------------------|--------------|-----------|------------|------------|------------|------------|------------|------------------|------------|------------|-------------|------------|------------|------------|------------|
|                  | Al<br>mg/L   | Y<br>µg/L | Th<br>µg/L | Fe<br>mg/L | Mn<br>mg/L | Li<br>µg/L | Sr<br>µg/L | V<br>µg/L        | Ni<br>µg/L | Mo<br>µg/L | As<br>µg/L  | Pb<br>µg/L | Sb<br>µg/L | Cd<br>µg/L | Tl<br>µg/L |
| S1               | 1.26         | 0.52      | 0.99       | 9.18       | 0.76       | 4.09       | 17.8       | 3.63             | 2.61       | 1.71       | 1.28        | 0.24       | 0.10       | 0.06       | 0.11       |
| S2               | 1.01         | 0.73      | 2.12       | 9.27       | 0.22       | 13.5       | 22.8       | 6.12             | 2.75       | 1.68       | 1.57        | 0.30       | 0.17       | 0.06       | 0.08       |
| S3               | 1.36         | 0.28      | 0.51       | 1.91       | 2.01       | 5.32       | 54.8       | 3.26             | 1.98       | 1.54       | 0.97        | 0.35       | 0.04       | 0.09       | 0.12       |
| S4               | 1.57         | 0.58      | 0.92       | 10.3       | 2.49       | 6.79       | 20.5       | 2.61             | 1.97       | 1.68       | 0.90        | 0.56       | 0.04       | 0.06       | 0.07       |
| S5               | 0.27         | 0.05      | 0.08       | 0.57       | 0.73       | 2.71       | 4.60       | 2.10             | 0.56       | 0.98       | 0.40        | 0.07       | 0.06       | 0.02       | 0.05       |
| S6               | 0.50         | 0.16      | 0.16       | 1.24       | 0.37       | 4.02       | 6.83       | 2.68             | 0.81       | 0.83       | 0.47        | 0.10       | 0.06       | 0.02       | 0.06       |
| S7               | 1.06         | 0.32      | 1.15       | 7.12       | 0.61       | 5.53       | 12.9       | 4.04             | 2.77       | 1.36       | 0.70        | 0.14       | 0.15       | 0.04       | 0.11       |
| S9               | 0.94         | 0.34      | 1.21       | 7.12       | 0.78       | 4.77       | 12.1       | 3.38             | 3.07       | 1.31       | 0.95        | 0.30       | 0.07       | 0.02       | 0.09       |
| S10              | 0.76         | 0.21      | 0.46       | 3.90       | 1.29       | 5.81       | 12.5       | 3.46             | 1.61       | 2.04       | 0.86        | 0.18       | 0.07       | 0.02       | 0.06       |
| S11              | 1.13         | 0.69      | 1.02       | 2.33       | 1.15       | 5.29       | 14.4       | 9.27             | 2.70       | 2.06       | 1.45        | 0.40       | 0.07       | 0.06       | 0.11       |
| S12              | 1.40         | 0.63      | 1.46       | 12.4       | 0.79       | 3.47       | 37.0       | 4.31             | 3.64       | 2.82       | 1.51        | 0.75       | 0.10       | 0.08       | 0.14       |
| S13              | 1.83         | 3.28      | 3.05       | 6.13       | 0.64       | 11.3       | 30.2       | 8.16             | 7.37       | 1.97       | 2.70        | 0.38       | 0.14       | 0.09       | 0.12       |
| S14              | 0.27         | 0.06      | 0.08       | 0.38       | 0.35       | 1.78       | 7.97       | 1.74             | 0.90       | 0.99       | 0.40        | 0.15       | 0.02       | 0.03       | 0.05       |
| S15              | 0.75         | 0.21      | 0.51       | 2.67       | 1.82       | 4.03       | 39.7       | 7.85             | 3.12       | 3.18       | 0.54        | 0.39       | 0.09       | 0.05       | 0.07       |
| S16              | 1.81         | 0.68      | 1.01       | 3.69       | 3.93       | 2.37       | 19.2       | 6.36             | 2.85       | 1.79       | 1.22        | 1.38       | 0.05       | 0.08       | 0.10       |
| S17              | 0.94         | 0.29      | 0.66       | 6.01       | 0.77       | 5.52       | 14.1       | 5.09             | 2.23       | 2.19       | 1.00        | 0.24       | 0.05       | 0.06       | 0.08       |
| S18              | 0.49         | 0.14      | 0.33       | 1.11       | 0.40       | 3.02       | 6.38       | 3.04             | 1.08       | 1.32       | 0.47        | 0.13       | 0.04       | 0.02       | 0.05       |
| S19              | 1.07         | 0.62      | 1.77       | 11.1       | 0.23       | 3.87       | 32.1       | 3.40             | 2.58       | 1.36       | 1.01        | 0.29       | 0.04       | 0.04       | 0.10       |
| S20              | 0.60         | 0.11      | 0.10       | 1.24       | 0.89       | 2.17       | 39.5       | 3.13             | 0.89       | 1.43       | 0.68        | 0.18       | 0.03       | 0.03       | 0.06       |
| P1               | 1.63         | 0.53      | 1.11       | 13.7       | 1.96       | 6.88       | 33.5       | 6.97             | 3.82       | 4.81       | 1.78        | 0.43       | 0.12       | 0.06       | 0.09       |
| P3               | 2.39         | 1.27      | 1.91       | 16.3       | 3.30       | 33.0       | 115        | 8.17             | 6.05       | 1.58       | 3.23        | 0.92       | 0.12       | 0.10       | 0.11       |
| P4               | 2.41         | 1.91      | 4.58       | 17.3       | 1.56       | 9.65       | 40.0       | 8.08             | 5.91       | 2.55       | 2.37        | 0.66       | 0.13       | 0.07       | 0.16       |
| P5               | 0.78         | 0.17      | 0.44       | 3.40       | 0.92       | 5.19       | 15.8       | 3.71             | 1.37       | 3.02       | 0.79        | 0.21       | 0.06       | 0.03       | 0.05       |
| P6               | 3.07         | 5.97      | 2.66       | 17.3       | 1.74       | 19.6       | 140        | 12.3             | 5.31       | 6.10       | 3.02        | 1.16       | 0.15       | 0.15       | 0.09       |
| P8               | 0.66         | 0.08      | 0.21       | 2.12       | 1.20       | 3.29       | 8.52       | 3.14             | 1.19       | 2.00       | 0.50        | 0.10       | 0.04       | 0.02       | 0.05       |
| P9               | 0.52         | 0.10      | 0.26       | 1.48       | 0.71       | 3.40       | 8.36       | 2.76             | 1.43       | 1.22       | 0.45        | 0.08       | 0.03       | 0.02       | 0.06       |

## Supporting information

|                 |      |      |      |      |      |      |      |      |      |      |      |      |      |      |      |  |
|-----------------|------|------|------|------|------|------|------|------|------|------|------|------|------|------|------|--|
| P10             | 0.70 | 0.22 | 0.25 | 2.66 | 1.41 | 1.92 | 35.7 | 5.49 | 1.67 | 2.02 | 0.67 | 0.30 | 0.03 | 0.06 | 0.06 |  |
| P11             | 1.49 | 0.91 | 3.88 | 17.5 | 0.28 | 8.84 | 22.2 | 10.2 | 3.95 | 2.80 | 1.35 | 0.44 | 0.09 | 0.06 | 0.10 |  |
| P12             | 0.46 | 0.11 | 0.33 | 0.94 | 0.33 | 4.02 | 5.76 | 3.48 | 1.01 | 1.17 | 0.49 | 0.11 | 0.04 | 0.03 | 0.06 |  |
| P17             | 0.39 | 0.11 | 0.22 | 1.32 | 0.54 | 5.49 | 31.1 | 4.06 | 1.14 | 5.41 | 0.64 | 0.17 | 0.03 | 0.03 | 0.05 |  |
| JPH4            | 1.13 | 0.69 | 1.91 | 5.55 | 0.50 | 6.17 | 22.4 | 4.21 | 3.31 | 1.45 | 1.58 | 0.41 | 0.10 | 0.03 | 0.12 |  |
| McK             | 0.87 | 0.44 | 1.81 | 9.32 | 0.39 | 6.53 | 11.1 | 4.16 | 2.24 | 1.92 | 1.74 | 0.18 | 0.08 | 0.03 | 0.08 |  |
| McM             | 0.30 | 0.08 | 0.17 | 0.49 | 0.56 | 2.10 | 8.16 | 1.68 | 0.69 | 1.22 | 0.44 | 0.15 | 0.03 | 0.03 | 0.04 |  |
| ANZ             | 0.13 | 0.03 | 0.08 | 0.07 | 0.23 | 2.80 | 2.79 | 0.85 | 0.44 | 0.41 | 0.26 | 0.03 | 0.02 | 0.01 | 0.03 |  |
| Max/Min         | 24   | 234  | 60   | 235  | 18   | 19   | 50   | 14   | 17   | 15   | 13   | 51   | 8    | 16   | 6    |  |
| Reference sites |      |      |      |      |      |      |      |      |      |      |      |      |      |      |      |  |
| UTK             | 0.15 | 0.02 | 0.03 | 0.06 | 0.36 | 0.52 | 3.74 | 0.50 | 0.36 | 0.21 | 0.16 | 0.08 | 0.02 | 0.02 | 0.03 |  |
| BMW             | 0.14 | 0.01 | 0.04 | 0.05 | 1.25 | 7.30 | 5.54 | 0.75 | 0.23 | 0.28 | 0.29 | 0.09 | 0.01 | 0.01 | 0.03 |  |
| CMW             | 0.13 | 0.01 | 0.02 | 0.03 | 0.41 | 0.45 | 3.83 | 0.38 | 0.12 | 0.19 | 0.16 | 0.06 | 0.01 | 0.04 | 0.05 |  |

**Table SI5.** Trace element concentrations (mean  $\pm$  S.D.) in moss waters from peat bogs in the ABS region and in a remote area (UTK).

| TEs             | JPH4  |       |       | McK   |       |       | McM   |       |       | ANZ   |       |       | UTK   |       |       |
|-----------------|-------|-------|-------|-------|-------|-------|-------|-------|-------|-------|-------|-------|-------|-------|-------|
|                 | 2019  | 2020  | 2021  | 2019  | 2020  | 2021  | 2019  | 2020  | 2021  | 2019  | 2020  | 2021  | 2019  | 2020  | 2021  |
| Al (mg/L)       | 1.13  | 0.76  | 2.43  | 0.87  | 0.63  | 2.66  | 0.30  | 0.32  | 0.96  | 0.13  | 0.20  | 0.50  | 0.15  | 0.10  | 0.58  |
|                 | $\pm$ |
|                 | 0.32  | 0.10  | 0.16  | 0.14  | 0.09  | 0.64  | 0.08  | 0.04  | 0.24  | 0.03  | 0.03  | 0.09  | 0.13  | 0.05  | 0.15  |
| Y ( $\mu$ g/L)  | 0.69  | 0.35  | 0.65  | 0.44  | 0.42  | 0.60  | 0.08  | 0.14  | 0.16  | 0.03  | 0.06  | 0.04  | 0.02  | 0.07  | 0.04  |
|                 | $\pm$ |
|                 | 0.23  | 0.02  | 0.44  | 0.12  | 0.13  | 0.04  | 0.03  | 0.05  | 0.07  | 0.01  | 0.02  | 0.01  | 5     | 0.02  | 0.02  |
| Th ( $\mu$ g/L) | 1.91  | 0.83  | 0.50  | 1.81  | 0.93  | 0.43  | 0.17  | 0.13  | 0.08  | 0.08  | 0.08  | 0.04  | 0.03  | 0.03  | 0.04  |
|                 | $\pm$ |
|                 | 0.46  | 0.13  | 0.34  | 0.12  | 0.12  | 0.03  | 0.04  | 0.02  | 0.03  | 0.03  | 0.02  | 0.01  | 0.01  | 0.01  | 0.02  |
| Fe (mg/L)       | 5.55  | 5.23  | 10.5  | 9.32  | 8.39  | 12.7  | 0.49  | 0.60  | 1.33  | 0.07  | 0.17  | 0.41  | 0.06  | 0.05  | 0.21  |
|                 | $\pm$ |
|                 | 0.63  | 1.49  | 5.48  | 3.36  | 3.94  | 2.78  | 0.08  | 0.20  | 0.58  | 0.01  | 0.01  | 0.08  | 0.06  | 0.03  | 0.04  |
| Mn (mg/L)       | 0.50  | 0.45  | 1.66  | 0.39  | 0.67  | 3.12  | 0.56  | 1.18  | 2.02  | 0.23  | 0.67  | 1.01  | 0.36  | 0.15  | 0.58  |
|                 | $\pm$ |
|                 | 0.63  | 0.12  | 0.79  | 0.10  | 0.12  | 1.55  | 0.08  | 0.33  | 0.27  | 0.07  | 0.22  | 0.34  | 0.52  | 0.14  | 0.07  |
| Li ( $\mu$ g/L) | 6.17  | 1.65  | 6.78  | 6.53  | 2.25  | 11.7  | 2.10  | 1.04  | 4.50  | 2.80  | 1.17  | 3.29  | 0.52  | 0.38  | 1.53  |
|                 | $\pm$ |
|                 | 3.62  | 0.51  | 1.80  | 0.52  | 0.88  | 2.49  | 0.03  | 0.14  | 1.34  | 0.46  | 0.16  | 1.23  | 0.10  | 0.05  | 0.76  |
| Sr ( $\mu$ g/L) | 22.4  | 10.8  | 49.7  | 11.1  | 12.8  | 45.5  | 8.16  | 6.76  | 19.6  | 2.79  | 3.70  | 7.02  | 3.74  | 3.97  | 9.89  |
|                 | $\pm$ |
|                 | 4.57  | 0.72  | 13.5  | 1.61  | 2.63  | 3.91  | 3.81  | 2.34  | 1.76  | 0.48  | 0.93  | 1.39  | 3.82  | 2.62  | 2.19  |
| V ( $\mu$ g/L)  | 4.21  | 1.62  | 9.14  | 4.16  | 1.88  | 7.00  | 1.68  | 1.11  | 3.66  | 0.85  | 0.66  | 2.20  | 0.50  | 0.21  | 1.43  |
|                 | $\pm$ |
|                 | 0.50  | 0.25  | 3.48  | 1.29  | 0.35  | 0.22  | 0.46  | 0.25  | 0.89  | 0.23  | 0.06  | 0.31  | 0.36  | 0.10  | 0.03  |
| Ni ( $\mu$ g/L) | 3.31  | 2.54  | 6.45  | 2.24  | 1.66  | 5.00  | 0.69  | 0.62  | 1.41  | 0.44  | 0.40  | 1.37  | 0.36  | 0.38  | 2.54  |

## Supporting information

|           |           |           |           |           |           |           |           |           |           |           |           |           |           |           |           |
|-----------|-----------|-----------|-----------|-----------|-----------|-----------|-----------|-----------|-----------|-----------|-----------|-----------|-----------|-----------|-----------|
|           | ±<br>0.83 | ±<br>0.70 | ±<br>0.62 | ±<br>0.47 | ±<br>0.04 | ±<br>1.63 | ±<br>0.16 | ±<br>0.22 | ±<br>0.42 | ±<br>0.13 | ±<br>0.05 | ±<br>0.84 | ±<br>0.28 | ±<br>0.35 | ±<br>0.28 |
| Mo (µg/L) | 1.45      | 0.73      | 4.70      | 1.92      | 0.79      | 4.84      | 1.22      | 0.46      | 2.30      | 0.41      | 0.40      | 1.74      | 0.21      | 0.04      | 0.54      |
|           | ±         | ±         | ±         | ±         | ±         | ±         | ±         | ±         | ±         | ±         | ±         | ±         | ±         | ±         | ±         |
| As (µg/L) | 0.48      | 0.10      | 1.71      | 0.43      | 0.42      | 1.29      | 0.08      | 0.12      | 0.20      | 0.09      | 0.08      | 0.51      | 0.14      | 0.01      | 0.21      |
|           | ±         | ±         | ±         | ±         | ±         | ±         | ±         | ±         | ±         | ±         | ±         | ±         | ±         | ±         | ±         |
| Pb (µg/L) | 1.58      | 0.35      | 2.79      | 1.74      | 0.58      | 3.77      | 0.44      | 0.19      | 1.14      | 0.26      | 0.13      | 0.60      | 0.16      | 0.06      | 0.43      |
|           | ±         | ±         | ±         | ±         | ±         | ±         | ±         | ±         | ±         | ±         | ±         | ±         | ±         | ±         | ±         |
| Sb (µg/L) | 0.06      | 0.01      | 0.33      | 0.52      | 0.11      | 0.31      | 0.05      | 0.02      | 0.11      | 0.03      | 0.04      | 0.09      | 0.05      | 0.02      | 0.10      |
|           | ±         | ±         | ±         | ±         | ±         | ±         | ±         | ±         | ±         | ±         | ±         | ±         | ±         | ±         | ±         |
| Cd (µg/L) | 0.41      | 0.30      | 0.81      | 0.18      | 0.25      | 0.90      | 0.15      | 0.21      | 0.64      | 0.03      | 0.10      | 0.20      | 0.08      | 0.09      | 0.26      |
|           | ±         | ±         | ±         | ±         | ±         | ±         | ±         | ±         | ±         | ±         | ±         | ±         | ±         | ±         | ±         |
| TI (µg/L) | 0.17      | 0.10      | 0.16      | 0.10      | 0.10      | 0.14      | 0.06      | 0.07      | 0.10      | 0.003     | 0.07      | 0.09      | 0.05      | 0.08      | 0.11      |
|           | ±         | ±         | ±         | ±         | ±         | ±         | ±         | ±         | ±         | ±         | ±         | ±         | ±         | ±         | ±         |
| Sb (µg/L) | 0.10      | 0.03      | 0.12      | 0.08      | 0.03      | 0.12      | 0.03      | 0.02      | 0.08      | 0.02      | 0.02      | 0.06      | 0.02      | 0.01      | 0.05      |
|           | ±         | ±         | ±         | ±         | ±         | ±         | ±         | ±         | ±         | ±         | ±         | ±         | ±         | ±         | ±         |
| Cd (µg/L) | 0.02      | 0.01      | 0.02      | 0.02      | 0.01      | 0.01      | 0.01      | 0.01      | 0.01      | 0.004     | 0.005     | 0.01      | 0.01      | 0.002     | 0.01      |
|           | ±         | ±         | ±         | ±         | ±         | ±         | ±         | ±         | ±         | ±         | ±         | ±         | ±         | ±         | ±         |
| TI (µg/L) | 0.03      | 0.03      | 0.09      | 0.03      | 0.03      | 0.10      | 0.03      | 0.03      | 0.07      | 0.01      | 0.01      | 0.03      | 0.02      | 0.03      | 0.07      |
|           | ±         | ±         | ±         | ±         | ±         | ±         | ±         | ±         | ±         | ±         | ±         | ±         | ±         | ±         | ±         |
| TI (µg/L) | 0.003     | 0.02      | 0.03      | 0.002     | 0.01      | 0.01      | 0.01      | 0.02      | 0.02      | 0.001     | 0.001     | 0.01      | 0.01      | 0.02      | 0.01      |
|           | ±         | ±         | ±         | ±         | ±         | ±         | ±         | ±         | ±         | ±         | ±         | ±         | ±         | ±         | ±         |
| TI (µg/L) | 0.12      | 0.05      | 0.13      | 0.08      | 0.03      | 0.12      | 0.04      | 0.02      | 0.07      | 0.03      | 0.01      | 0.07      | 0.03      | 0.01      | 0.09      |
|           | ±         | ±         | ±         | ±         | ±         | ±         | ±         | ±         | ±         | ±         | ±         | ±         | ±         | ±         | ±         |
|           | 0.04      | 0.01      | 0.01      | 0.01      | 0.002     | 0.02      | 0.01      | 0.01      | 0.002     | 0.005     | 0.01      | 0.01      | 0.03      | 0.003     | 0.01      |

**Table SI6.** Trace Elements enriched  $\geq 2x$  in moss waters from peat bogs in the ABS region relative to the reference site, UTK, in autumn 2019-2021.

| Sites | 2019      |           |           |           |           |           |           |           |           |           |           |           |           |           |           |
|-------|-----------|-----------|-----------|-----------|-----------|-----------|-----------|-----------|-----------|-----------|-----------|-----------|-----------|-----------|-----------|
|       | JPH4      | <b>Fe</b> | <b>Th</b> | <b>Y</b>  | <b>Ni</b> | <b>Li</b> | <b>Al</b> | <b>V</b>  | <b>As</b> | <b>Sr</b> | <b>Mo</b> | <b>Mn</b> | <b>Pb</b> | <b>Sb</b> | <b>Tl</b> |
|       | 136       | 65        | 32        | 13        | 12        | 11        | 11        | 11        | 11        | 9         | 7         | 7         | 6         | 5         | 2         |
| McK   | <b>Fe</b> | <b>Th</b> | <b>Y</b>  | <b>Li</b> | <b>As</b> | <b>Mo</b> | <b>V</b>  | <b>Al</b> | <b>Ni</b> | <b>Mn</b> | <b>Sr</b> | <b>Sb</b> | <b>Tl</b> | <b>Pb</b> | <b>Cd</b> |
|       | 228       | 62        | 20        | 12        | 12        | 12        | 11        | 9         | 9         | 5         | 5         | 5         | 3         | 3         | 2         |
| McM   | <b>Fe</b> | <b>Mo</b> | <b>Mn</b> | <b>Th</b> | <b>V</b>  | <b>Li</b> | <b>Sr</b> | <b>Y</b>  | <b>Al</b> | <b>Ni</b> | <b>As</b> | <b>Pb</b> | <b>Cd</b> | <b>Sb</b> | <b>Tl</b> |
|       | 12        | 8         | 7         | 6         | 5         | 4         | 4         | 4         | 3         | 3         | 3         | 3         | 2         | 2         | 2         |
| ANZ   | <b>Li</b> | <b>Mn</b> | <b>Mo</b> | <b>Th</b> | <b>V</b>  | <b>Fe</b> | <b>Ni</b> | <b>As</b> |           |           |           |           |           |           |           |
|       | 6         | 3         | 3         | 3         | 2         | 2         | 2         | 2         |           |           |           |           |           |           |           |
| 2020  |           |           |           |           |           |           |           |           |           |           |           |           |           |           |           |
| JPH4  | <b>Fe</b> | <b>Th</b> | <b>Mo</b> | <b>Ni</b> | <b>Al</b> | <b>V</b>  | <b>Tl</b> | <b>As</b> | <b>Y</b>  | <b>Pb</b> | <b>Mn</b> | <b>Li</b> | <b>Sr</b> | <b>Sb</b> |           |
|       | 140       | 38        | 17        | 11        | 9         | 9         | 8         | 6         | 6         | 6         | 5         | 4         | 4         | 3         |           |
| McK   | <b>Fe</b> | <b>Th</b> | <b>Mo</b> | <b>V</b>  | <b>As</b> | <b>Al</b> | <b>Mn</b> | <b>Ni</b> | <b>Y</b>  | <b>Li</b> | <b>Sr</b> | <b>Tl</b> | <b>Pb</b> | <b>Sb</b> | <b>Cd</b> |
|       | 225       | 43        | 19        | 10        | 10        | 8         | 8         | 8         | 7         | 6         | 5         | 5         | 5         | 3         | 2         |
| McM   | <b>Fe</b> | <b>Mn</b> | <b>Mo</b> | <b>V</b>  | <b>Th</b> | <b>Al</b> | <b>Pb</b> | <b>Li</b> | <b>Ni</b> | <b>As</b> | <b>Sr</b> | <b>Tl</b> | <b>Y</b>  | <b>Sb</b> |           |
|       | 16        | 14        | 11        | 6         | 6         | 4         | 4         | 3         | 3         | 3         | 3         | 3         | 2         | 2         |           |
| ANZ   | <b>Mo</b> | <b>Mn</b> | <b>Fe</b> | <b>V</b>  | <b>Th</b> | <b>Li</b> | <b>Al</b> | <b>Ni</b> | <b>As</b> | <b>Sb</b> | <b>Tl</b> | <b>Pb</b> |           |           |           |
|       | 9         | 8         | 5         | 4         | 4         | 3         | 2         | 2         | 2         | 2         | 2         | 2         |           |           |           |
| 2021  |           |           |           |           |           |           |           |           |           |           |           |           |           |           |           |
| JPH4  | <b>Fe</b> | <b>Y</b>  | <b>Th</b> | <b>Mo</b> | <b>As</b> | <b>V</b>  | <b>Li</b> | <b>Sr</b> | <b>Al</b> | <b>Pb</b> | <b>Mn</b> | <b>Ni</b> | <b>Sb</b> | <b>Tl</b> |           |
|       | 52        | 18        | 14        | 9         | 7         | 6         | 5         | 5         | 4         | 4         | 3         | 3         | 2         | 2         |           |
| McK   | <b>Fe</b> | <b>Y</b>  | <b>Th</b> | <b>Mo</b> | <b>Li</b> | <b>As</b> | <b>Al</b> | <b>V</b>  | <b>Mn</b> | <b>Sr</b> | <b>Pb</b> | <b>Sb</b> | <b>Ni</b> |           |           |
|       | 63        | 17        | 12        | 10        | 9         | 9         | 5         | 5         | 5         | 5         | 4         | 3         | 2         |           |           |
| McM   | <b>Fe</b> | <b>Mo</b> | <b>Mn</b> | <b>Y</b>  | <b>Li</b> | <b>V</b>  | <b>As</b> | <b>Pb</b> | <b>Th</b> | <b>Al</b> | <b>Sr</b> | <b>Sb</b> |           |           |           |
|       | 7         | 5         | 4         | 4         | 3         | 3         | 3         | 3         | 3         | 2         | 2         | 2         |           |           |           |
| ANZ   | <b>Mo</b> | <b>Sb</b> | <b>Li</b> | <b>V</b>  | <b>Mn</b> | <b>Fe</b> |           |           |           |           |           |           |           |           |           |
|       | 3         | 3         | 2         | 2         | 2         | 2         |           |           |           |           |           |           |           |           |           |

**Table SI7.** Expected concentrations of dissolved Al (mg/L) in moss waters at all sites, if controlled by the solubility of Gibbsite or amorphous Al-hydroxide

| <b>Sites</b> | <b>pH</b> | <b>Gibbsite</b> | <b>Amorphous Al-hydroxide</b> |
|--------------|-----------|-----------------|-------------------------------|
| <b>JPH4</b>  | 3.90      | 7               | 214                           |
| <b>McK</b>   | 3.64      | 41              | 1290                          |
| <b>McM</b>   | 3.62      | 47              | 1481                          |
| <b>ANZ</b>   | 3.56      | 71              | 2242                          |
| <b>UTK</b>   | 3.62      | 47              | 1481                          |

Note: The pH of moss waters presented here was measured in the field using a handheld device (Hanna HI98129, Hanna Instruments, Woonsocket, RI, USA).

**Table SI8.** Ratios of bitumen-enriched elements in moss waters from peat bogs in the Athabasca Bituminous Sands (ABS) region. The average ratios for the ABS region are also included.

| Industrial sites | Bitumen-enriched element ratios |      |       |
|------------------|---------------------------------|------|-------|
|                  | V/Ni                            | V/Mo | Ni/Mo |
| S1               | 1.4                             | 2.1  | 1.5   |
| S2               | 2.2                             | 3.7  | 1.6   |
| S3               | 1.6                             | 2.1  | 1.3   |
| S4               | 1.3                             | 1.6  | 1.2   |
| S5               | 3.7                             | 2.1  | 0.6   |
| S6               | 3.3                             | 3.2  | 1.0   |
| S7               | 1.5                             | 3.0  | 2.0   |
| S9               | 1.1                             | 2.6  | 2.3   |
| S10              | 2.1                             | 1.7  | 0.8   |
| S11              | 3.4                             | 4.5  | 1.3   |
| S12              | 1.2                             | 1.5  | 1.3   |
| S13              | 1.1                             | 4.1  | 3.7   |
| S14              | 1.9                             | 1.8  | 0.9   |
| S15              | 2.5                             | 2.5  | 1.0   |
| S16              | 2.2                             | 3.5  | 1.6   |
| S17              | 2.3                             | 2.3  | 1.0   |
| S18              | 2.8                             | 2.3  | 0.8   |
| S19              | 1.3                             | 2.5  | 1.9   |
| S20              | 3.5                             | 2.2  | 0.6   |
| P1               | 1.8                             | 1.4  | 0.8   |
| P3               | 1.3                             | 5.2  | 3.8   |
| P4               | 1.4                             | 3.2  | 2.3   |
| P5               | 2.7                             | 1.2  | 0.5   |
| P6               | 2.3                             | 2.0  | 0.9   |
| P8               | 2.6                             | 1.6  | 0.6   |
| P9               | 1.9                             | 2.3  | 1.2   |
| P10              | 3.3                             | 2.7  | 0.8   |
| P11              | 2.8                             | 3.9  | 1.4   |
| P12              | 3.5                             | 3.0  | 0.9   |
| P17              | 3.6                             | 0.8  | 0.2   |
| JPH4             | 1.3                             | 2.9  | 2.3   |
| McK              | 1.9                             | 2.2  | 1.2   |
| McM              | 2.4                             | 1.4  | 0.6   |
| ANZ              | 1.9                             | 2.1  | 1.1   |
| ABS average      | 2.2                             | 2.5  | 1.3   |
